# Supplementary material
Source: publisher figshare collection journal article supplement (https://gsapubs.figshare.com/ndownloader/files/38176032)
Supplement: Supplementary file 1 [file 38176032]

## Sheet: Sheet1
Input Thermochronological Data
Model Run Name	AHe & AFT data combined									AHe & ZHe data combined					ZHe & AFT data combined					AHe, ZHe, & AFT data combined
Sample Name	15MTP-01	84MP02	84MP04	84MP05	84MP03	15MTP-02	15MTP-03	15MTP-04	15MTP-05	15MTP-01	15MTP-02	15MTP-03	15MTP-04	15MTP-05	15MTP-01	84MP05	84MP03	84MP02	84MP04	15MTP-01	84MP02	84MP04	84MP05	84MP03	15MTP-02	15MTP-03	15MTP-04	15MTP-05
Individual/multi-sample/profile model	Profile									Prrofile					Profile					Profile
(e.g.) AFT Data	No	Yes	Yes	Yes	Yes	No	No	No	No	No	No	No	No	No	No	Yes	Yes	Yes	Yes	No	Yes	Yes	Yes	Yes	No	No	No	No
# Single Grains	-	20	20	20	20	-	-	-	-	-	-	-	-	-	-	20	20	20	20	-	20	20	20	20	-	-	-	-
# HCT Lengths	-	No	No	No	No	-	-	-	-	-	-	-	-	-	-	No	No	No	??	-	No	No	No	No	-	-	-	-
Compositional Proxy	-	Dpar	Dpar	Dpar	Dpar	-	-	-	-	-	-	-	-	-	-	Dpar	Dpar	Dpar	Dpar	-	Dpar	Dpar	Dpar	Dpar	-	-	-	-
(e.g.) Apatite (U-Th)/He (#)	Yes	No	No	Yes	Yes	Yes	Yes	Yes	Yes	Yes	Yes	Yes	Yes	Yes	No	Yes	Yes	Yes	Yes	Yes	No	No	Yes	Yes	Yes	Yes	Yes	Yes
# Single Grains	4	-	-	4	5	5	5	4	7	4	5	5	4	7	-	4	5	5	5	4	-	-	4	5	5	5	4	7
(e.g.) Zircon (U-Th)/He (#)	No	No	No	No	No	No	No	No	No	Yes	No	No	No	No	Yes	No	No	No	No	Yes	No	No	No	No	No	No	No	No
# Single Grains	-	-	-	-	-	-	-	-	-	3	-	-	-	-	3	-	-	-	-	3	-	-	-	-	-	-	-	-
General ranges for prior, additional constraints, temperature offset
General prior range
Time (Ma)	33±33									33±33					33±33					33±33
Temperature (°C)	70±70									70±70					70±70					70±70
Comment	Default rages applied by QTQt version 5.6.2									Default rages applied by QTQt version 5.6.2					Default rages applied by QTQt version 5.6.2					Default rages applied by QTQt version 5.6.2
Constraint #1
Time (Ma)	--	--	--	--	--	--	--	--	--	--	--	--	--	--	--	--	--	--	--	--	--	--	--	--	--	--	--	--
Temperature (°C)	--	--	--	--	--	--	--	--	--	--	--	--	--	--	--	--	--	--	--	--	--	--	--	--	--	--	--	--
Comment	--	--	--	--	--	--	--	--	--	--	--	--	--	--	--	--	--	--	--	--	--	--	--	--	--	--	--	--
Temperature offset of profile samples
Palaeo-temperature offset (°C)/Geothermal gradient (°C/km)	30±1°C/km									30±1°C/km					30±1°C/km					30±1°C/km
Present-day temperature offset (°C)/Geothermal gradient (°C/km)	7±3°C/km									7±3°C/km					7±3°C/km					7±3°C/km
Offset allowed to vary over time?	No									No					No					No
System-and model-specific parameters
Modelling software (and version)	QTQt (Version 5.7.1) (Gallagher, 2012)									QTQt (Version 5.7.1) (Gallagher, 2012)					QTQt (Version 5.7.1) (Gallagher, 2012)					QTQt (Version 5.7.1) (Gallagher, 2012)
FT annealing model
FT annealing model	Keetcham et al. (2007)									-					Ketcham et al. 92007)					Keetcham et al. (2007)
C-axis projection	No									-					No					No
Compositional parameter	Yes (Dpar)									-					Yes (Dpar)					Yes (Dpar)
Etchant	No									-					No					No
Apatite He Kinetic Model
Radiation Damage	Flowers et al. (2009)									Flowers et al. (2009)					-					Flowers et al. (2009)
comments on RD model used	model used in original study									model used in original study					-					model used in original study
Additional parameters	-									-					-					-
Alpha-ejection	input ages uncorrected									input ages uncorrected					-					input ages uncorrected
Resampling of data?	Resampling of observed ages*									Resampling of observed ages*					-					Resampling of observed ages*
Zircon He Kinetic Model
Radiation Damage	-									Guenthner et al. (2013)					Guenthner et al. (2013)					Guenthner et al. (2013)
comments on RD model used	-									model used in original study					model used in original study					model used in original study
Additional parameters	-									-					-					-
Alpha-ejection	-									input ages uncorrected					input ages uncorrected					input ages uncorrected
Resampling of data?	-									Resampling of observed ages*					Resampling of observed ages*					Resampling of observed ages*
# Iterations
Burn in	50000									50000					50000					50000
Post-Burn in	200000									200000					200000					200000
Comments
MCMC Parameters
Acceptance Rates
time & temperature	0.0803 & 0.3440									0.0987 & 0.4011					0.1176 & 0.4688					0.1399 & 0.3750
birth & death	0.0159 & 0.0160									0.0227 & 0.0226					0.0173 & 0.0174					0.0233 & 0.0235
Comments	time acceptance rate is low, birth and death rates similar, convergence of likelihood chains									time acceptance rate is low, birth and death rates similar					time acceptance rate is low, birth and death rates similar					time acceptance rate is low, birth and death rates similar, convergence of likelihood chains
										convergence of likelihood chains					convergence of likelihood chains
Data. Fit assessment	visual plot inspection of obs. vs. pred. ages									visual plot inspection of obs. vs. pred. ages					visual plot inspection of obs. vs. pred. ages					visual plot inspection of obs. vs. pred. ages
Model used for interpretation	Expected									Expected					Expected					Expected
Comments	most commonly recommended (Gallagher, 2012)									most commonly recommended (Gallagher, 2012)					most commonly recommended (Gallagher, 2012)					most commonly recommended (Gallagher, 2012)
*Footnote 1	Choice for original study									Choice for original study					Choice for original study					Choice for original study
